# Supplementary material for: Short-term sleep deprivation leads to decreased systemic redox metabolites and altered epigenetic status
Source: PLoS One. 2017 Jul 24;12(7):e0181978. doi: 10.1371/journal.pone.0181978 (PMC5524320; doi:10.1371/journal.pone.0181978)
Supplement: S1 Table — (XLSX) [file pone.0181978.s001.xlsx]

## Sheet: Sheet1
Age	Gender	TimeinBed	TotSleeepTime	SleepLat	SleepEff	ATP_BL	ATP_SD	Cysteine_BL	Cysteine_SD	Homocysteine_BL	Homocysteine_SD	GSH_BL	GSH_SD	CORT_BL	CORT_SD
22	1	8.18	6.47	4.33	82.06	0.86	0.79	207.433	194.654	10.59	6.48	5.02	3.41	0.307	0.107
19	1	7.09	5.45	6.29	79.91	0.73	0.81	219.548	168.499	11.12	7.35	4.42	3.52	0.47	0.343
19	1	8.19	5.54	32.5	70.6	0.82	0.68	205.669	191.255	9.65	8.14	4.63	4.15	0.847	0.386
28	1	9.07	7.45	21.83	85.9	0.92	0.93	198.478	179.913	10.66	5.07	4.08	3.17	0.491	0.271
21	1	7.12	5.37	8.5	78.05	0.87	0.65	210.913	185.247	9.48	9.36	5.06	3.58	0.514	0.136
22	1	8.07	6.17	6.67	73.32	0.92	0.7	200.882	191.087	8.54	5.33	4.97	3.58	0.41	0.291
18	1	6.41	5.55	6.33	88.64	0.82	0.65	209.584	195.483	10.49	8.4	4.59	3.22	1.086	0.81
21	1	6.28	5.23	3.33	86.64	0.89	0.72	213.494	203.5	9.67	6.61	5.26	3.72	0.642	0.457
21	1	8.22	7.03	13.75	85.19	0.85	0.84	206.12	199.555	9.14	9.05	5.06	4.13	0.952	0.334
21	1	6.52	5.44	20.5	83.28	0.91	0.76	210.984	200.233	11.08	7.53	4.98	4.56	0.462	0.274
19	2	8.43	7.12	22	82.78	0.89	0.73	191.658	201.229	10.23	6.69	3.95	4.39	0.56	0.296
19	2	8.12	7.04	21.33	85.82	0.91	0.79	210.331	198.564	12.19	7.46	4.15	2.95	0.491	0.183
22	2	10.3	8.27	38.83	80.61	0.9	0.63	209.509	196.355	10.87	7.94	4.29	3.32	0.584	0.564
20	2	9.47	8.15	16.83	84.24	0.91	0.68	214.684	220.999	9.05	10.75	5.18	4.28	0.402	0.172
30	2	9.22	7.28	10.2	80.46	0.86	0.71	212.238	193.106	9.81	7.62	3.61	2.12	0.596	0.385
18	2	6.55	6.02	9.4	87.61	0.81	0.63	182.546	190.28	12.58	6.15	3.73	2.46	1.111	0.913
21	2	8.38	7.09	28.8	83.67	0.91	0.66	208.473	196.345	11.34	7.86	4.41	2.31	0.458	0.163
21	2	8.56	8.31	26.33	84.68	0.68	0.59	212.549	215.294	10.34	7.08	5.05	3.16	0.906	0.139
19	2	8.4	7.31	12.17	86.79	0.92	0.78	200.972	187.94	9.89	8.56	4.59	3.79	0.597	0.487
